# Supplementary material for: Exceptionally low thermal conductivity in simple two-dimensional SiS: anomalous emergence of rattling phonon modes in non-caged materials
Source: Royal Society of Chemistry journal article supplement (doi:10.1039/d4tc02208d), 2024-01-01
Supplement: d4tc02208d1.pdf [file d4tc02208d1.pdf]

## Supplementary Information

### Exceptionally low thermal conductivity in simple two-dimensional SiS: anomalous emergence of rattling phonon modes in non-caged materials

Tingting Zhang\* and Liyan Zhu\*

#### S1. Convergence test

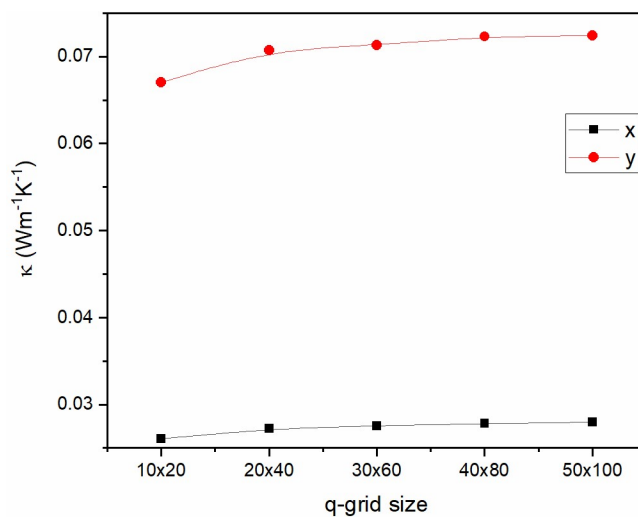

Figure S1. Convergence of thermal conductivity along the x and y direction with respect to the q-grid size.

#### S2. The thermal conductivity without considering the VDW interaction

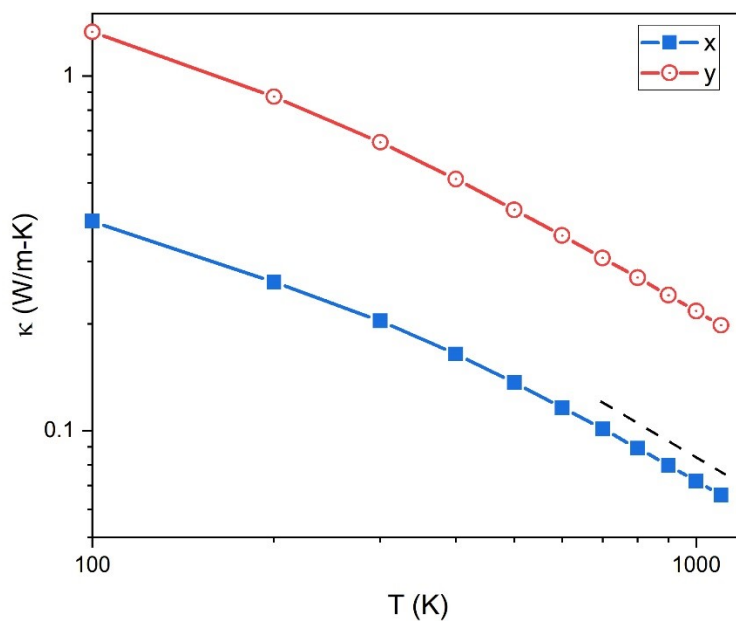

Figure S2. Thermal conductivity of 2D SiS without considering the VDW interaction

### S3. Effect of four phonon scattering on thermal conductivity

We use the Fourthorder.py package to calculate the fourth-order force constants up to the second neighbor within a  $3 \times 5 \times 1$  supercell. We then solve the BTE, incorporating the four-phonon scattering processes, using a q-mesh of  $20 \times 40 \times 1$ . The scattering rates for four-phonon processes are approximately two orders of magnitude smaller than those for three-phonon processes. As a result, four-phonon scattering has a minimal impact on thermal conductivity. For instance, the thermal conductivities are  $0.072 \text{ Wm}^{-1}\text{K}^{-1}$  without considering four-phonon scattering, and  $0.068 \text{ Wm}^{-1}\text{K}^{-1}$  when it is included.

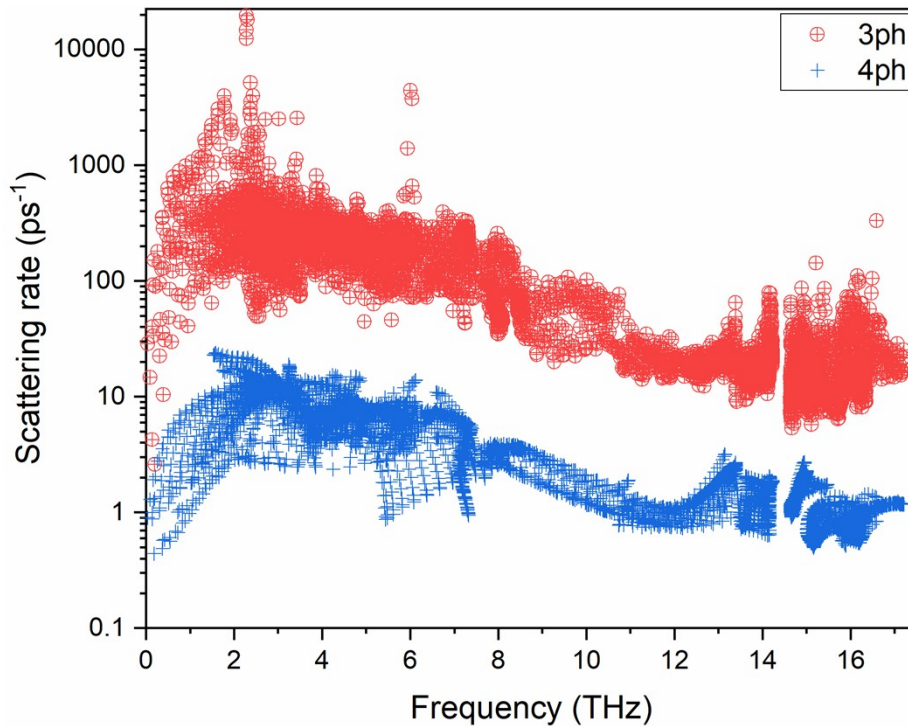

Figure S3. Scattering rates of three-phonon (3ph) and four-phonon (4ph) processes as a function of frequency.

### S4. The electronic transport properties of n-type 2D SiS

Since the work by Yang et al.<sup>1</sup> revealed that electron carriers in 2D SiS exhibit much higher mobility than hole carriers, we focus on the electronic transport properties of n-type 2D SiS computed using BoltzTrap<sup>2</sup>. Figure S3 shows the ratio between electronic conductivity ( $\sigma$ ) and relaxation time ( $\tau$ ), the Seebeck coefficient (S), and the power factor (PF) as a function of carrier

concentration for n-type 2D SiS.

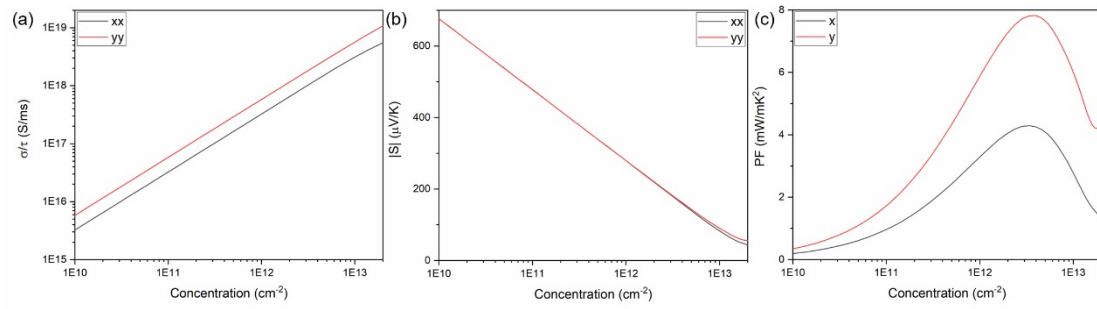

Figure S4. The  $\sigma/\tau$ , Seebeck coefficient ( $S$ ), and power factor (PF) as a function of carrier concentration for n-type 2D SiS.

## References

1. J.-H. Yang, Y. Zhang, W.-J. Yin, X. Gong, B. I. Yakobson and S.-H. Wei, *Nano Lett.*, 2016, **16**, 1110-1117.
2. G. K. Madsen and D. J. Singh, *Comput. Phys. Commun.*, 2006, **175**, 67-71.
